# Supplementary material for: Cyst Nematode Infection Elicits Alteration in the Level of Reactive Nitrogen Species, Protein S-Nitrosylation and Nitration, and Nitrosoglutathione Reductase in Arabidopsis thaliana Roots
Source: MDPI journal article supplement (doi:10.3390/antiox9090795), 2020-08-26
Supplement: s1 [file s1]

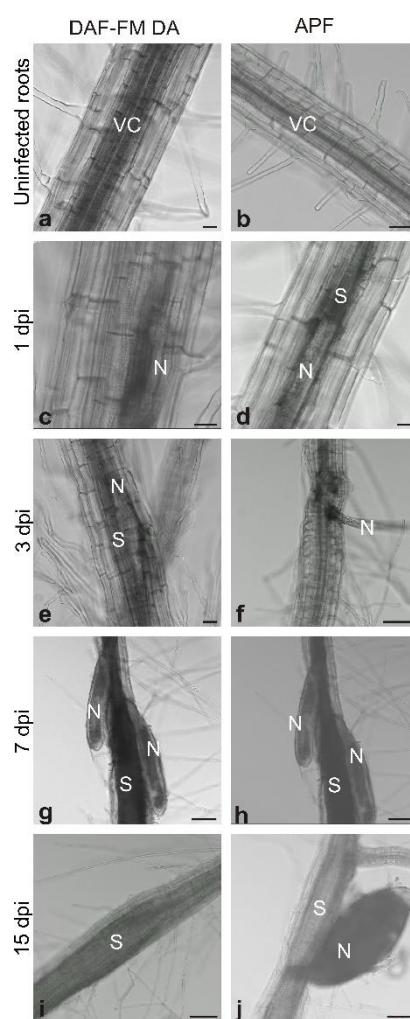

**Figure S1.** Negative control reactions for nitric oxide (a, c, e, g, i) and peroxynitrite (b, d, f, h, j) detection with 4-amino-5-methylamino-20,70-difluorofluorescein diacetate (DAF-FM DA) and 3'-(*p*-aminophenyl) fluorescein (APF), respectively. In negative control samples, fluorescent probes were omitted. Abbreviations: N- nematode, S- syncytium, VC- vascular cylinder. Scale bars: 20  $\mu$ m (a-e) and 100  $\mu$ m (f-j).

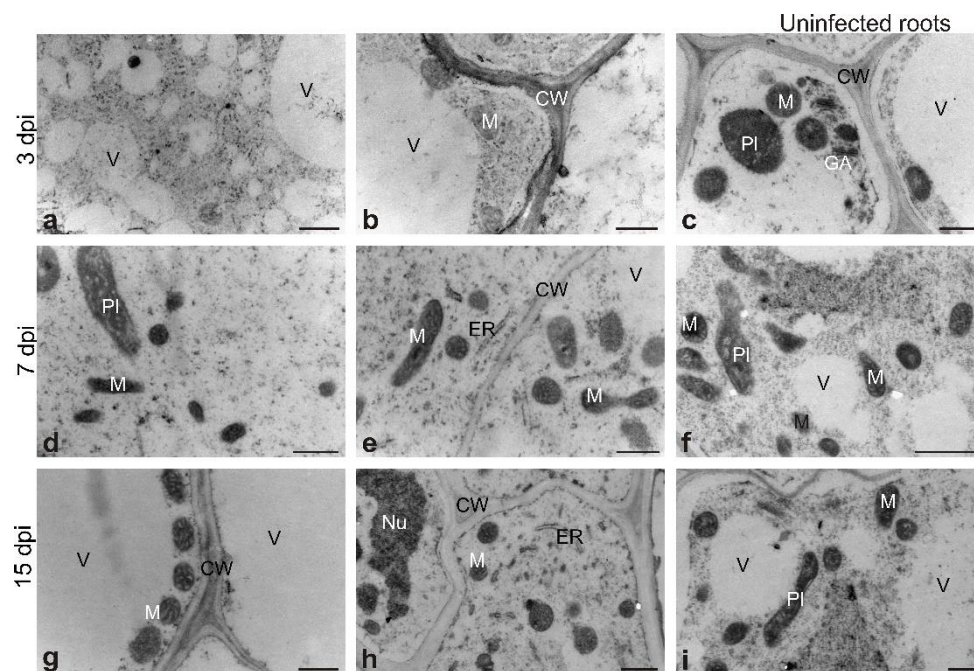

**Figure S2.** Negative controls for nitrosogluthathione reductase immunogold labelling. In negative control samples, primary antibodies were omitted. Abbreviations: CW- cell wall, ER- endoplasmic reticulum, GA- Golgi apparatus, M- mitochondrion, Nu- nucleus, PI- plastid, V- vacuole. Scale bars: 0.5  $\mu$ m.
